# Supplementary material for: Assessing Wetland Ecosystem Services in a Biosphere Reserve in South Africa Through Citizen Science
Source: Preprints.org preprint supplement (doi:10.20944/preprints202311.1055.v1), 2023-11-16
Supplement: Supplementary file 1 [file supplementary]

**Table 1**: Ecosystem Services Associations (P-Values)

|  | % Yes | Village | Ward | Status | Gender | Age | Education | Employment | HH Members | Res Status | HH Income |
| --- | --- | --- | --- | --- | --- | --- | --- | --- | --- | --- | --- |
| Flood attenuation | 12.1 | .002 | .000 | .197 | .445 | .092 | .020 | .528 | .347 | .797 | .002 |
| Streamflow regulation | 12.9 | .000 | .001 | .422 | .245 | .945 | .553 | .372 | .556 | .268 | .376 |
| Sediment trapping | 6.9 | .000 | .000 | .621 | .575 | .885 | .834 | .505 | .721 | .277 | .809 |
| Phosphate assimilation | 0.0 | - |  |  |  |  |  |  |  |  |  |
| Nitrate Assimilation | 0.0 | - |  |  |  |  |  |  |  |  |  |
| Toxicant assimilation | 3.4 | .499 | .220 | .741 | .697 | .796 | .807 | .167 | .261 | .976 | .709 |
| Erosion control | 37.9 | .003 | .003 | .828 | .750 | .439 | .415 | .710 | .618 | .674 | .668 |
| Carbon storage | 2.6 | .160 | .048 | .730 | .799 | .763 | .357 | .068 | .267 | .633 | .880 |
| Biodiversity maintenance | 6.0 | .150 | .454 | .121 | .511 | .914 | .502 | .638 | .577 | .000 | .557 |
| Provision of water for human use | 57.8 | .000 | .000 | .593 | .279 | .035 | .605 | .055 | .949 | .295 | .030 |
| Provision of harvestable resources | 42.2 | .172 | .181 | .112 | .482 | .658 | .325 | .810 | .903 | .446 | .266 |
| Food for livestock | 81.9 | .000 | .000 | .243 | .463 | .094 | .650 | .088 | .480 | .888 | .000 |
| Provision of cultivated foods | 60.3 | .006 | .012 | .261 | .531 | .098 | .101 | .723 | .297 | .334 | .194 |
| Cultural and spiritual experiences | 9.5 | .033 | .188 | .710 | .323 | .750 | .618 | .384 | .607 | .026 | .137 |
| Tourism and recreation | 10.3 | .000 | .000 | .309 | .050 | .984 | .184 | .040 | .338 | .925 | .553 |
| Education and research | 21.6 | .056 | .116 | .345 | .394 | .027 | .216 | .062 | .186 | .113 | .371 |

*Significant associations are not greyed out at 5% level of significance
